# Supplementary material
Source: PubMed Central journal article supplement (PMC4741297)

# Figure 6

## Panel K

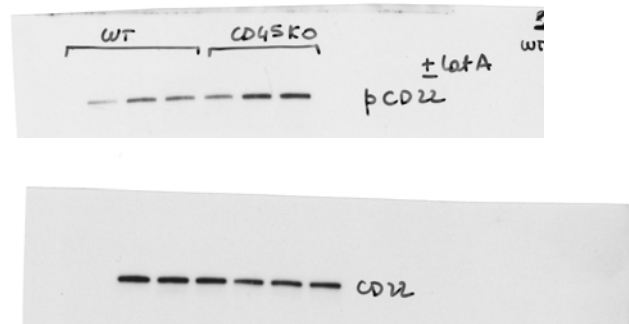

Supplement: EMBJ-35-258-s003.pdf [file EMBJ-35-258-s003.pdf]
